# Supplementary material
Source: Springer Nature journal article supplement (https://www.springermedizin.de/resource/supplementary/12885_2011_2901_MOESM4_ESM.pdf/9462242)
Supplement: MOESM4 [file 9462242]

| Reference | Variant | Max   | 33K          | 51K            | 75K           | 81K           | 97K            |
|-----------|---------|-------|--------------|----------------|---------------|---------------|----------------|
| KRAS      | G12C    | 35.68 | 0.00 (9,193) | 0.00 (11,919)  | 0.00 (10,622) | 0.00 (9,327)  | 35.68 (11,226) |
| KRAS      | G12D    | 38.90 | 0.00 (9,193) | 0.00 (11,919)  | 0.01 (10,622) | 38.90 (9,327) | 0.00 (11,226)  |
| KRAS      | G12V    | 22.80 | 0.00 (9,193) | 22.80 (11,919) | 0.00 (10,622) | 0.00 (9,327)  | 0.00 (11,226)  |

### Sample 97K: c.34G>T

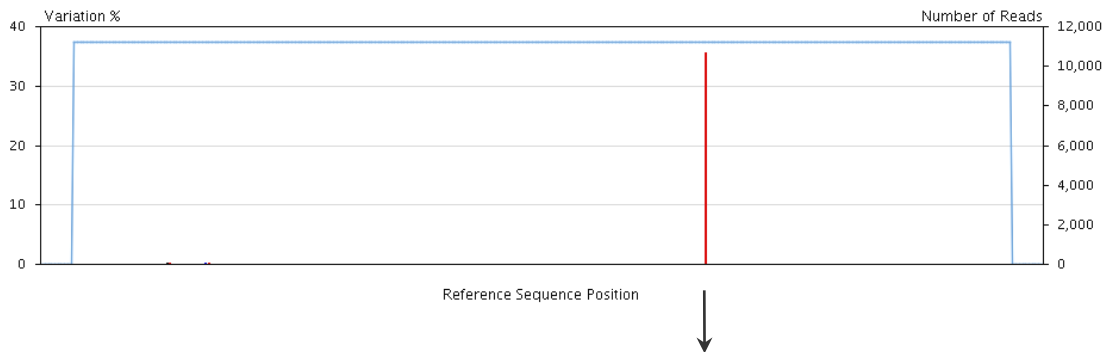

TATAAGGCCTGCTGAAAATGACTGAATATAAACTTGTGGTAGTTGGAGCTGGTGGCGTAGGCAAGAGTGCCTTGACGATAC  
 TATAAGGCCTGCTGAAAATGACTGAATATAAACTTGTGGTAGTTGGAGCTGGTGGCGTAGGCAAGAGTGCCTTGACGATAC  
 TATAAGGCCTGCTGAAAATGACTGAATATAAACTTGTGGTAGTTGGAGCTTGTGGCGTAGGCAAGAGTGCCTTGACGATAC  
 TATAAGGCCTGCTGAAAATGACTGAATATAAACTTGTGGTAGTTGGAGCTGGTGGCGTAGGCAAGAGTGCCTTGACGATAC  
 TATAAGGCCTGCTGAAAATGACTGAATATAAACTTGTGGTAGTTGGAGCTGGTGGCGTAGGCAAGAGTGCCTTGACGATAC
